# Supplementary material for: Machine Learning Reveals a General Understanding of Printability in Formulations Based on Rheology Additives
Source: PubMed Central journal article supplement (PMC9561784; doi:10.1002/advs.202202638), 2022-08-25
Supplement: ADVS-9-2202638-s002.pdf [file ADVS-9-2202638-s002.pdf]

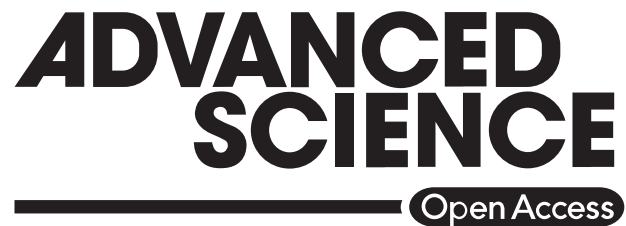

## Supporting Information

for *Adv. Sci.*, DOI 10.1002/adv.202202638

Machine Learning Reveals a General Understanding of Printability in Formulations Based on Rheology Additives

*Ali Nadernezhad\* and Jürgen Groll\**

## Supporting Information

### **Machine learning reveals a general understanding of printability in formulations based on rheology additives**

*Ali Nadernezhad\* and Jürgen Groll\**

Chair for Functional Materials for Medicine and Dentistry at the Institute for Functional Materials and Biofabrication (IFB) and Bavarian Polymer Institute (BPI), University of Würzburg, Pleicherwall 2, 97070 Würzburg, Germany

\* Correspondence to: [ali.nadernezhad@fmz.uni-wuerzburg.de](mailto:ali.nadernezhad@fmz.uni-wuerzburg.de); [juergen.groll@fmz.uni-wuerzburg.de](mailto:juergen.groll@fmz.uni-wuerzburg.de)

## Template for collection of features from rheology experiments

The rheological data from the testing protocol were collected according to Table S1. The data obtained from rheological experiments were further processed in later steps to generate features.

**Table S1.** List of rheological data used for further processing and generation of features

| Test type                          | Measured quantities                                                  | The range used for further processing     |
|------------------------------------|----------------------------------------------------------------------|-------------------------------------------|
| Frequency sweep                    | Storage modulus (G)                                                  | Angular frequency: 1.0-10 rad/s           |
|                                    | Damping factor (DF)                                                  | Angular frequency: 1.0-10 rad/s           |
| Amplitude sweep                    | Storage modulus (G)                                                  | Oscillatory strain: 0.1-100%              |
|                                    | Damping factor (DF)                                                  | Oscillatory strain: 0.1-100%              |
| 3-Interval Thixotropy Test (3ITT)  | The percentage recovery of viscosity during the third interval       | Time: 5, 10, and 30 seconds               |
| 3-Interval Oscillatory Test (TIOT) | The percentage recovery of storage modulus during the third interval | Time: 5, 10, and 30 seconds               |
| Shear stress sweep                 | Viscosity                                                            | Rotational shear stress: 1-100 Pa         |
| Transient shear steps              | Viscosity                                                            | Shear rate steps: 0.1-100 s <sup>-1</sup> |

## List of features used for training the ML model

Table S2 lists all the features used to train the ML model in this study. The description of each coded feature is provided for a better understanding of each feature.

**Table S2.** List of full features and their corresponding descriptions

| Feature                  | Description                                                                | Proportioned <sup>1</sup> |
|--------------------------|----------------------------------------------------------------------------|---------------------------|
| logical_FS_CO            | If a crossover in frequency sweep was observed                             | NA                        |
| FS_DF_6                  | Damping factor at 1.0 rad/s angular frequency                              | Yes                       |
| FS_DF_5                  | Damping factor at 1.58 rad/s angular frequency                             | Yes                       |
| FS_DF_4                  | Damping factor at 2.51 rad/s angular frequency                             | Yes                       |
| FS_DF_3                  | Damping factor at 3.98 rad/s angular frequency                             | Yes                       |
| FS_DF_2                  | Damping factor at 6.31 rad/s angular frequency                             | Yes                       |
| FS_DF_1                  | Damping factor at 10.0 rad/s angular frequency                             | Yes                       |
| ratio_FS_DF@1.0/FS_DF@10 | Proportioned ratio between Damping factor at 1.0 rad/s to DF at 10.0 rad/s | NA                        |
| logical_SS_CO            | If a crossover in Amplitude sweep was observed                             | NA                        |
| SS_G_1                   | Storage modulus at 0.1% strain                                             | Yes                       |

|                |                                                    |     |
|----------------|----------------------------------------------------|-----|
| SS_G_2         | Storage modulus at 0.148% strain                   | Yes |
| SS_G_3         | Storage modulus at 0.217% strain                   | Yes |
| SS_G_4         | Storage modulus at 0.318% strain                   | Yes |
| SS_G_5         | Storage modulus at 0.467% strain                   | Yes |
| SS_G_6         | Storage modulus at 0.685% strain                   | Yes |
| SS_G_7         | Storage modulus at 1.0% strain                     | Yes |
| SS_G_8         | Storage modulus at 1.48% strain                    | Yes |
| SS_G_9         | Storage modulus at 2.17% strain                    | Yes |
| SS_G_10        | Storage modulus at 3.18% strain                    | Yes |
| SS_G_11        | Storage modulus at 4.67% strain                    | Yes |
| SS_G_12        | Storage modulus at 6.85% strain                    | Yes |
| SS_G_13        | Storage modulus at 10.0% strain                    | Yes |
| SS_G_14        | Storage modulus at 14.8% strain                    | Yes |
| SS_G_15        | Storage modulus at 21.7% strain                    | Yes |
| SS_G_16        | Storage modulus at 31.8% strain                    | Yes |
| SS_G_17        | Storage modulus at 46.6% strain                    | Yes |
| SS_G_18        | Storage modulus at 68.5% strain                    | Yes |
| SS_G_19        | Storage modulus at 100.0% strain                   | Yes |
| SS_DF_1        | Damping factor at 0.1% strain                      | Yes |
| SS_DF_2        | Damping factor at 0.148% strain                    | Yes |
| SS_DF_3        | Damping factor at 0.217% strain                    | Yes |
| SS_DF_4        | Damping factor at 0.318% strain                    | Yes |
| SS_DF_5        | Damping factor at 0.467% strain                    | Yes |
| SS_DF_6        | Damping factor at 0.685% strain                    | Yes |
| SS_DF_7        | Damping factor at 1.0% strain                      | Yes |
| SS_DF_8        | Damping factor at 1.48% strain                     | Yes |
| SS_DF_9        | Damping factor at 2.17% strain                     | Yes |
| SS_DF_10       | Damping factor at 3.18% strain                     | Yes |
| SS_DF_11       | Damping factor at 4.67% strain                     | Yes |
| SS_DF_12       | Damping factor at 6.85% strain                     | Yes |
| SS_DF_13       | Damping factor at 10.0% strain                     | Yes |
| SS_DF_14       | Damping factor at 14.8% strain                     | Yes |
| SS_DF_15       | Damping factor at 21.7% strain                     | Yes |
| SS_DF_16       | Damping factor at 31.8% strain                     | Yes |
| SS_DF_17       | Damping factor at 46.6% strain                     | Yes |
| SS_DF_18       | Damping factor at 68.5% strain                     | Yes |
| SS_DF_19       | Damping factor at 100.0% strain                    | Yes |
| SS_LVER_strain | Strain at the limit of linear viscoelastic range   | No  |
| SS_LVER_G      | Storage modulus at the limit of viscoelastic range | Yes |

|                                   |                                                                                                                    |     |
|-----------------------------------|--------------------------------------------------------------------------------------------------------------------|-----|
| SS_CO_strain                      | Crossover strain in Amplitude sweep                                                                                | No  |
| ratio_SS_CO_strain/SS_LVER_strain | Ratio between crossover strain and the strain at the limit of viscoelastic                                         | NA  |
| ratio_SS_CO_G/SS_G@0.1            | Ratio between storage modulus at crossover and proportioned storage modulus at 0.1% strain                         | NA  |
| ratio_SS_CO_G/SS_LVER_G           | Proportioned ratio between storage modulus at crossover and storage modulus at the limit of the viscoelastic range | NA  |
| logical_FC_yield                  | If a peak viscosity in the stress sweep test was observed                                                          | NA  |
| FC_yield_Eta                      | Peak viscosity in the stress sweep test                                                                            | No  |
| FC_CY_Eta0                        | Zero-shear viscosity from Carreau-Yasuda model                                                                     | Yes |
| FC_CY_Lambda                      | Consistency index ( $\lambda$ ) from Carreau-Yasuda model                                                          | No  |
| 3ITT_Re_5s                        | Recovery of viscosity in 3ITT after 5s                                                                             | Yes |
| 3ITT_Re_10s                       | Recovery of viscosity in 3ITT after 10s                                                                            | Yes |
| 3ITT_Re_30s                       | Recovery of viscosity in 3ITT after 30s                                                                            | Yes |
| 3IOT_Re_5s                        | Recovery of storage modulus in 3IOT after 5s                                                                       | Yes |
| 3IOT_Re_10s                       | Recovery of storage modulus in 3IOT after 10s                                                                      | Yes |
| 3IOT_Re_30s                       | Recovery of storage modulus in 3IOT after 30s                                                                      | Yes |
| Print_Flow                        | Proportionality index of extruded volume to the applied pressure                                                   | No  |
| logical_Print_Filament            | If a filament was formed during extrusion (no filament, broken filament, yes)                                      | NA  |

<sup>1</sup> Proportioned ratio was calculated by dividing the respected value by that of the corresponding HA solution with the same molecular weight and concentration (Yes, No, NA=Not Applicable)

|     |     |      |      |      |      |
|-----|-----|------|------|------|------|
| 5.0 | 5.0 | 4.6  | 4.4  | 4.2  | 4.8  |
| 5.0 |     |      |      |      |      |
| 4.6 |     | 4.0  | 3.5  | 3.25 | 3.75 |
| 4.4 |     | 3.5  | 3.0  | 2.33 | 2.66 |
| 4.2 |     | 3.25 | 2.33 | 2.0  | 1.5  |
| 4.8 |     | 3.75 | 2.66 | 1.5  | 1.0  |

**Figure S1.** The weighting approach was used to penalize the easy-to-resolve areas of the grid. The numbers next to or inside each grid show the multiplication factor.

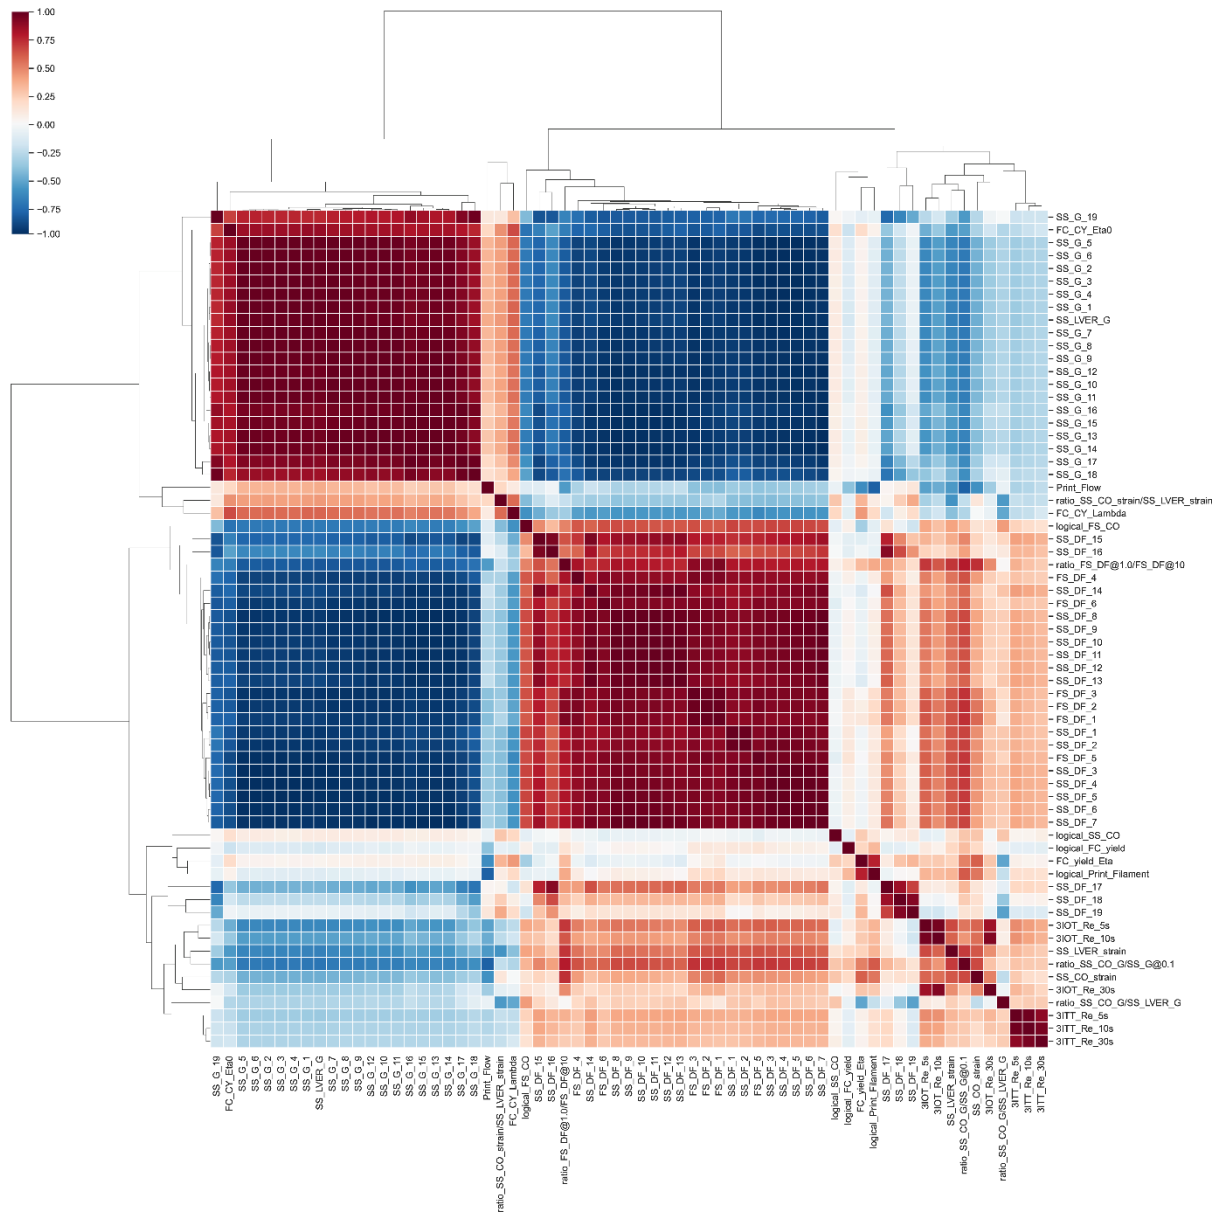

**Figure S2.** The results of Spearman's correlation analysis. A value of 1 or -1 denotes high correlation, and the direction of association depends on the sign of the correlation coefficient.

### **Dependency of the predictions made by the RF model on features**

The Partial Dependence Plots (PDPs) in **Figure S3** and **Figure S4** show the average marginal effect of each feature on the predicted outcome. This analysis showed a monotonic relationship between the response and the most important features determined by SHAP analysis (Figure S3). Moreover, the two-way PDPs in Figure S3D-F show the dependence of the printability on the mutual influence of the first three impactful features, as determined by SHAP.

The model's predictive performance depended on the features' value; the impact varied depending on the features' importance. In this way, the most impactful features (as determined by SHAP) in Figure S3 had a considerably significant influence on the predicted printability, while this influence was observed to a lesser degree by decreasing the feature importance (Figure S4).



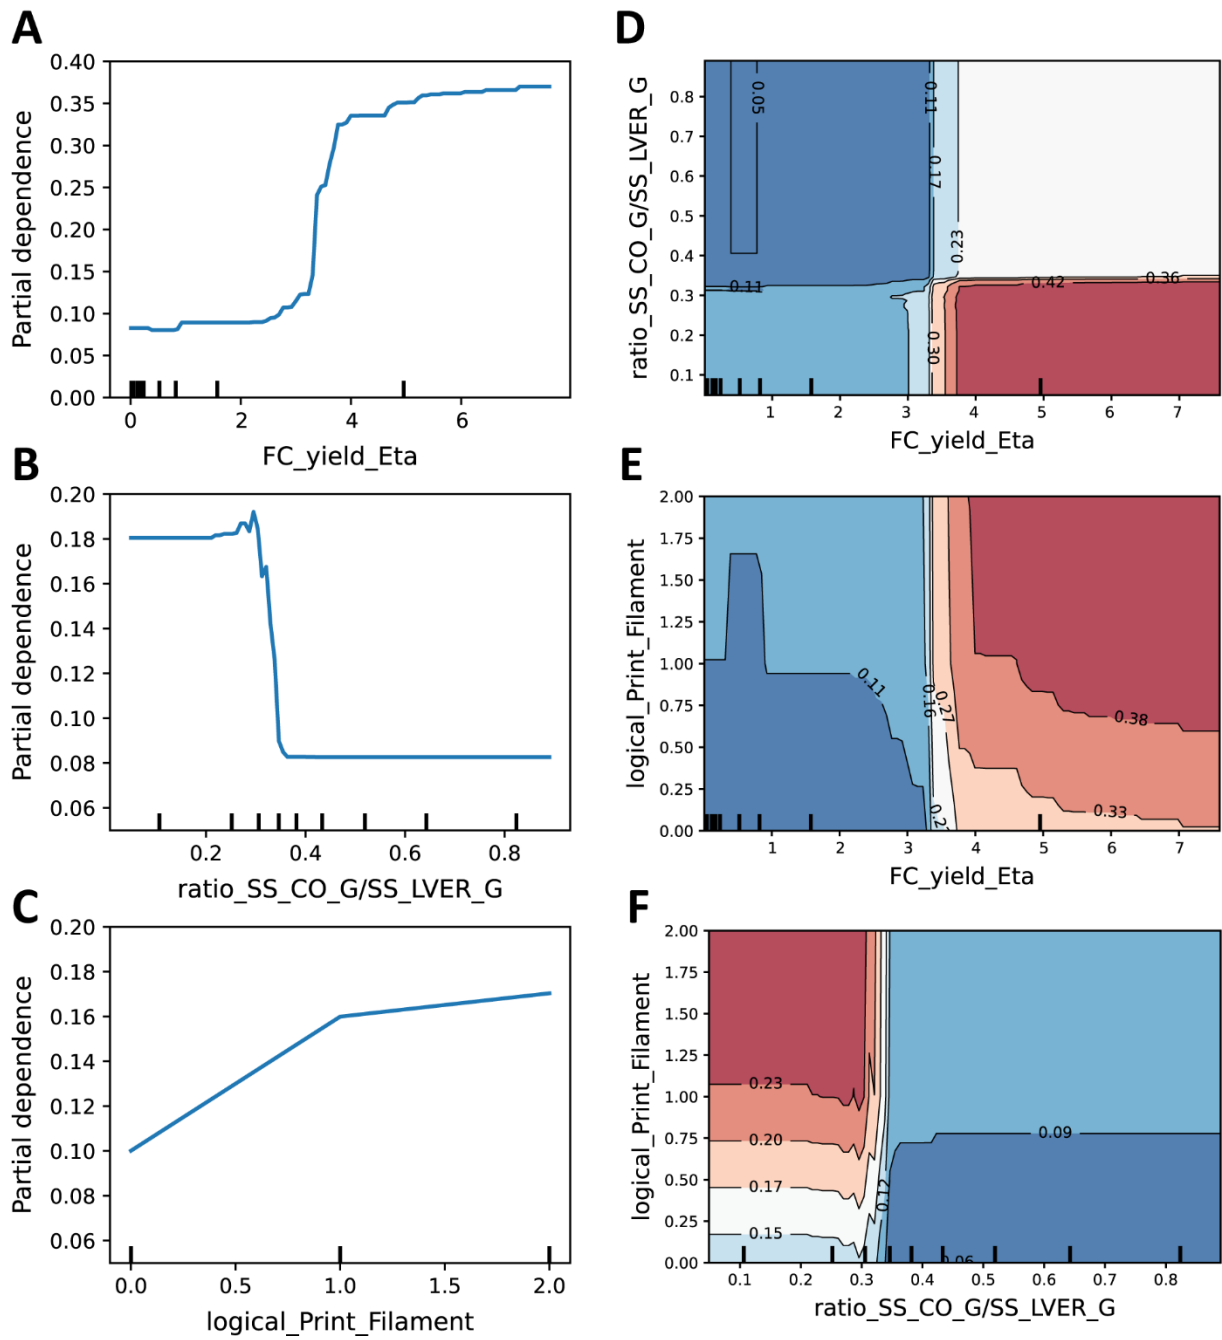

**Figure S3.** Partial dependence plots of the three most important features on the predicted printability. A-C) dependence of the predicted printability on each feature's value. D-F) the two-way PDPs showing the dependence of predicted printability on the joint values of three important features.

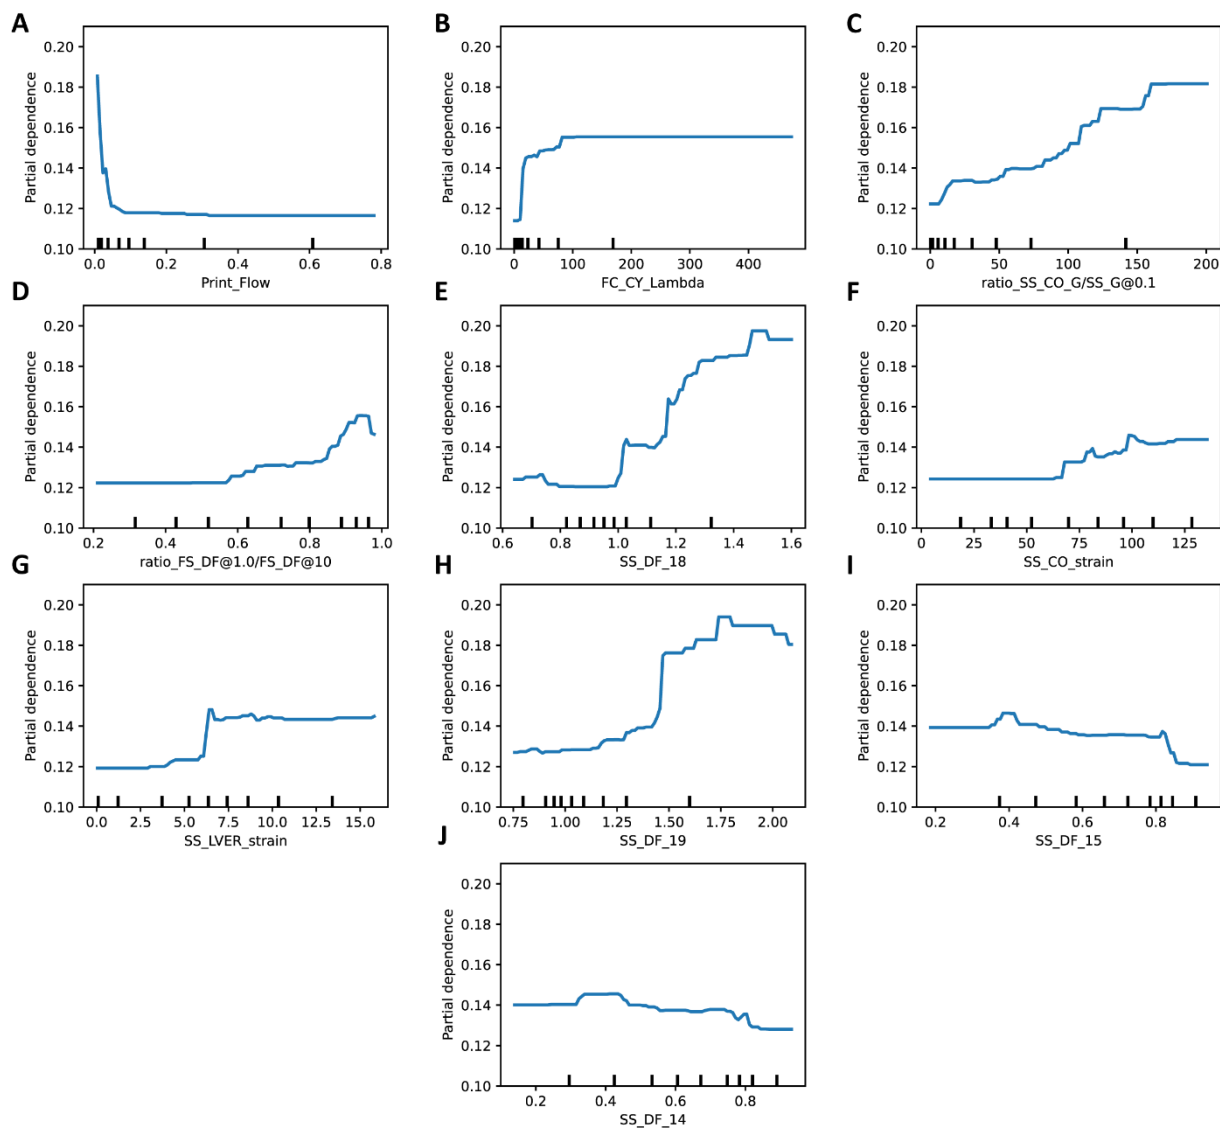

**Figure S4.** Partial dependence plots show predicted printability's dependency on each feature's value. Features were ranked from A to J based on their importance determined by SHAP analysis.
